# Table of Contents

## FEATURES

### *Approaches to Biology Teaching and Learning*

**Putting the Horse Back in Front of the Cart: Using Visions and Decisions about High-Quality Learning Experiences to Drive Course Design**

Deborah Allen and Kimberly Tanner .....85–89

### *WWW.Life Sciences Education*

#### **Potent Cells**

Dennis Liu .....90–94

### *Book Review*

#### **Understanding by Design: A Framework for Effecting Curricular Development and Assessment**

Don Roth, Jesse Anderson, and Robert Mayes .....95–97

## ARTICLES

### **WormClassroom.org: An Inquiry-rich Educational Web Portal for Research Resources of *Caenorhabditis elegans***

Fong-Mei Lu, Kevin W. Eliceiri, James Stewart, and John G. White .....98–108

### **Genome Consortium for Active Teaching: Meeting the Goals of BIO2010**

A. Malcolm Campbell, Mary Lee S. Ledbetter, Laura L.M. Hoopes, Todd T. Eckdahl, Laurie J. Heyer, Anne Rosenwald, Edison Fowls, Scott Tonidandel, Brooke Bucholtz, and Gail Gottfried .....109–118

### **Collaborative Co-Mentored Dissertations Spanning Institutions: Influences on Student Development**

Richard McGee and Mary J. DeLong .....119–131

### **Prescribed Active Learning Increases Performance in Introductory Biology**

Scott Freeman, Eileen O'Connor, John W. Parks, Matthew Cunningham, David Hurley, David Haak, Clarissa Dirks, and Mary Pat Wenderoth .....132–139

### **Learning to Improve: Using Writing to Increase Critical Thinking Performance in General Education Biology**

Ian J. Quitadamo and Martha J. Kurtz .....140–154

### **A Faculty Team Works to Create Content Linkages among Various Courses to Increase Meaningful Learning of Targeted Concepts of Microbiology**

Gili Marbach-Ad, Volker Briken, Kenneth Frauwirth, Lian-Yong Gao, Steven W. Hutcheson, Sam W. Joseph, David Mosser, Beth Parent, Patricia Shields, Wenxia Song, Daniel C. Stein, Karen Swanson, Katerina V. Thompson, Robert Yuan, and Ann C. Smith .....155–162

### **Cooperative Learning in Industrial-sized Biology Classes**

Norris Armstrong, Shu-Mei Chang, and Marguerite Brickman .....163–171

### **Biology Intensive Orientation for Students (BIOS): A Biology “Boot Camp”**

Sheri Maples Wischusen and E. William Wischusen .....172–178

### **Teaching Human Genetics with Mustard: Rapid Cycling *Brassica rapa* (Fast Plants Type) as a Model for Human Genetics in the Classroom Laboratory**

Douglas L. Wendell and Dawn Pickard .....179–185

*A goal of CBE—Life Sciences Education is to stimulate dialogue; therefore, readers are invited to submit comments on these articles through Letters to the Editor at <http://www.lifescied.org>.*

### *On the Cover*

Map of 2001–2007 GCAT-participating schools. GCAT faculty on 134 campuses in 36 states (plus two universities in Canada and one in Australia) have used GCAT resources. The nodes in this interactive map are hyperlinks to the appropriate departmental websites. Clicking on one of the species icons will display all the campuses that use that particular species of microarray. More than 100 faculty have learned how to work with DNA microarrays at GCAT microarray workshops. Many of these GCAT members teach at minority-serving institutions and bring genomics to a diverse population of undergraduates. National Science Foundation-funded workshops will be offered in July of 2007, 2008, and 2009. For more information on GCAT, visit [www.bio.davidson.edu/GCAT](http://www.bio.davidson.edu/GCAT).
